# Supplementary material for: Extracellular ATP induces apoptosis through P2X7R activation in acute myeloid leukemia cells but not in normal hematopoietic stem cells
Source: PubMed Central journal article supplement (PMC5351599; doi:10.18632/oncotarget.13927), 2016-12-13
Supplement: oncotarget-08-5895-s001.pdf [file oncotarget-08-5895-s001.pdf]

## Extracellular ATP induces apoptosis through P2X7R activation in acute myeloid leukemia cells but not in normal hematopoietic stem cells

### Supplementary Materials

**Supplementary Table S1: Patient characteristics**

| # PT | Cell source | FAB   | Molecular abnormalities                                                              | Karyotype         | WBC, cells/ $\mu$ L | Sex | Age |
|------|-------------|-------|--------------------------------------------------------------------------------------|-------------------|---------------------|-----|-----|
| 1    | BM          | M4    | NPM <sup>-</sup> , FLT3 <sup>-</sup>                                                 | t(16;16)          | 95,450              | F   | 46  |
| 2    | PB          | M2    | NPM <sup>+</sup> , FLT3-ITD <sup>+</sup>                                             | NA                | 64,250              | M   | 70  |
| 3    | BM          | M4    | NPM <sup>+</sup> , FLT3 <sup>+</sup>                                                 | t(4)              | 129,000             | F   | 60  |
| 4    | BM          | NA    | NA                                                                                   | Normal            | 15,800              | F   | 59  |
| 5    | PB/BM       | M1    | NPM <sup>-</sup> , FLT3 <sup>+</sup> , DNMT3A <sup>-</sup>                           | Normal            | 57,400              | F   | 64  |
| 6    | PB          | M2-M4 | NA                                                                                   | inv(16)           | 14,000              | M   | 68  |
| 7    | BM          | NA    | NPM <sup>+</sup> , FLT3 <sup>-</sup>                                                 | NA                | NA                  | M   | 75  |
| 8    | BM          | M4-M5 | NPM <sup>+</sup> , FLT3 <sup>+</sup>                                                 | Normal            | 50,000              | M   | 63  |
| 9    | BM          | M3    | NPM <sup>-</sup> , FLT3 <sup>-</sup> , PML/RAR $\alpha$                              | t(15;17)(q22;q12) | 1,100               | M   | 39  |
| 10   | PB/BM       | M4    | NPM <sup>+</sup> , FLT3 <sup>-</sup>                                                 | Normal            | 25,300              | F   | 63  |
| 11   | PB          | M1-M2 | NPM <sup>+</sup> , FLT3 <sup>-</sup>                                                 | Normal            | 21,300              | F   | 66  |
| 12   | BM          | M0-M1 | NPM <sup>-</sup> , FLT3 <sup>-</sup> , DNMT3A <sup>-</sup>                           | Complex           | 8,000               | M   | 21  |
| 13   | PB          | M2-M4 | NPM <sup>+</sup> , FLT3-ITD <sup>+</sup> ; FLT3-TKD <sup>-</sup> DNMT3A <sup>+</sup> | Normal            | 46,700              | F   | 68  |
| 14   | BM          | M3    | NPM <sup>-</sup> , FLT3 <sup>-</sup> , PML/RAR $\alpha$                              | t(15;17)(q22;q12) | 8,060               | M   | 43  |
| 15   | PB          | M3    | NPM <sup>+</sup> , FLT3 <sup>-</sup> , PML/RAR $\alpha$                              | t(15;17)          | 0,650               | M   | 69  |
| 16   | BM          | M1    | NPM <sup>-</sup> , FLT3 <sup>-</sup> , DNMT3A <sup>-</sup>                           | Complex           | 2,800               | M   | 48  |
| 17   | BM          | M1    | FLT3-ITD <sup>+</sup> , NPM <sup>-</sup>                                             | t(6;9)(p23;q34)   | 29,670              | F   | 46  |
| 18   | BM          | M5    | NPM <sup>-</sup> , FLT3 <sup>-</sup>                                                 | Complex           | NA                  | M   | 17  |
| 19   | PB          | M1    | NPM <sup>-</sup> , FLT3 <sup>+</sup>                                                 | Normal            | 35,830              | M   | 57  |
| 20   | PB          | NA    | NA                                                                                   | NA                | 11,800              | M   | 90  |
| 21   | PB          | M0-M1 | NPM <sup>+</sup> , FLT3-ITD <sup>-</sup>                                             | Normal            | 189,500             | M   | 64  |
| 22   | PB/BM       | M4    | NPM <sup>-</sup> , FLT3 <sup>-</sup> , DNMT3A <sup>-</sup>                           | inv(16)           | 11,300              | M   | 55  |
| 23   | PB          | M1    | NPM <sup>-</sup> , FLT3 <sup>-</sup>                                                 | t(8;21)           | 26,000              | M   | 54  |
| 24   | PB          | M3    | NPM <sup>-</sup> , FLT3 <sup>-</sup>                                                 | t(15,17)          | 1,250               | F   | 53  |
| 25   | PB          | M1    | NPM <sup>+</sup> , FLT3 <sup>+</sup>                                                 | Normal            | 95,000              | F   | 51  |
| 26   | PB/BM       | M0-M1 | NA                                                                                   | +(8)              | 4,280               | M   | 68  |
| 27   | PB/BM       | M0    | NPM <sup>-</sup> , FLT3 <sup>-</sup>                                                 | t(6;11)           | 100,000             | M   | 19  |
| 28   | PB          | M0    | NPM <sup>+</sup> , FLT3-ITD <sup>+</sup>                                             | Normal            | 108,600             | F   | 67  |
| 29   | BM          | M1    | NPM <sup>+</sup> , FLT3 <sup>-</sup>                                                 | Normal            | 3,660               | F   | 36  |
| 30   | PB          | M3    | PML/RAR $\alpha$                                                                     | t(15,17)          | 99,300              | F   | 77  |
| 31   | BM          | M2    | FLT3 <sup>-</sup>                                                                    | Normal            | 1,580               | M   | 73  |
| 32   | PB          | M1    | NPM <sup>+</sup> , FLT3-ITD <sup>+</sup> , FLT3-TKD <sup>+</sup>                     | Normal            | 103,000             | F   | 34  |
| 33   | BM          | M1    | FLT3 <sup>-</sup> , NPM <sup>-</sup>                                                 | Normal            | 37,200              | F   | 38  |
| 34   | PB          | NA    | NPM <sup>-</sup> , FLT3-ITD <sup>+</sup>                                             | Normal            | 88,680              | M   | 69  |

Legend: PB, peripheral blood; BM, bone marrow; NPM, nucleophosmin; FLT3 ITD (TDK), fms-like tyrosine kinase 3 internal tandem duplication (tyrosine kinase domain mutation); DNMT3A, DNA-methyltransferase 3A; NA, Not available.
